# Supplementary material for: Optimizing Engagement in an Online Dietary Intervention for Depression (My Food & Mood Version 3.0): Cohort Study
Source: PubMed Central journal article supplement (PMC8047812; doi:10.2196/24871), 2021-03-31
Supplement: mental_v8i3e24871_app2.pdf [file mental_v8i3e24871_app2.pdf]

Supplementary Material

My Food Mood Programs Key Activity Time Requirements

| My Food & Mood Version 1.0         |                | My Food & Mood Version 2.1                     |                | My Food & Mood Version 2.2 |                | My Food & Mood Version 3.0 |                |
|------------------------------------|----------------|------------------------------------------------|----------------|----------------------------|----------------|----------------------------|----------------|
| Videos                             |                |                                                |                |                            |                |                            |                |
| Module 1: Introduction             | 0:10:29        | Module 1: Introduction                         | 0:02:11        | Modules 1 to 8             | 0:28:59        | Modules 1 to 8             | 0:28:59        |
| Module 2: What is good gut health? | 0:06:45        | Module 2: How does diet improve mental health? | 0:02:25        | Modules 9 to 16            | 0:23:41        | Modules 9 to 16            | 0:23:41        |
| Module 3: What is fibre?           | 0:11:50        | Module 3: The Mediterranean Diet               | 0:03:49        |                            |                |                            |                |
| Module 4: Pre & Pro biotics        | 0:10:45        | Module 4: How do I make changes to my diet?    | 0:03:58        |                            |                |                            |                |
| Module 5: Fats & Proteins          | 0:06:35        | Module 5: Plant foods: fruit and vegetables    | 0:03:58        |                            |                |                            |                |
| Module 6: Junk Food                | 0:10:14        | Module 6 - Plant foods: legumes                | 0:04:25        |                            |                |                            |                |
|                                    |                | Module 7: Plant foods: nuts and seeds          | 0:03:54        |                            |                |                            |                |
|                                    |                | Module 8: Plant foods: Grains                  | 0:04:09        |                            |                |                            |                |
|                                    |                | Module 9: Olive oil                            | 0:03:42        |                            |                |                            |                |
|                                    |                | Module 10: Fish and seafood                    | 0:03:33        |                            |                |                            |                |
|                                    |                | Module 11: Herbs and spices                    | 0:03:16        |                            |                |                            |                |
|                                    |                | Module 12: Alcohol                             | 0:02:15        |                            |                |                            |                |
|                                    |                | Module 13: Other food groups (red meat, dairy) | 0:03:20        |                            |                |                            |                |
|                                    |                | Module 14: Extras / Discretionary Foods        | 0:02:17        |                            |                |                            |                |
|                                    |                | Module 15: Fermented foods                     | 0:02:26        |                            |                |                            |                |
|                                    |                | Module 16: The Mediterranean lifestyle         | 0:02:27        |                            |                |                            |                |
| <b>Total</b>                       | <b>0:56:38</b> |                                                | <b>0:52:05</b> |                            | <b>0:52:40</b> |                            | <b>0:52:40</b> |
| Activities - Goal Setting          |                |                                                |                |                            |                |                            |                |
| Goal Setting 1                     | 0:01:00        | Module 6 - Set a SMART goal                    | 0:01:00        | Week 3 SMART Goal          | 0:01:00        | Goal Entries               | 0:06:00        |
| Goal Setting 2                     | 0:01:00        | Module 7 - Set a SMART goal                    | 0:01:00        | Week 4 SMART Goal          | 0:01:00        |                            |                |
| Goal Setting 3                     | 0:01:00        | Module 8 - Set a SMART goal                    | 0:01:00        | Week 5 SMART Goal          | 0:01:00        |                            |                |
| Goal Setting 4                     | 0:01:00        | Module 9 - Set a SMART goal                    | 0:01:00        | Week 6 SMART Goal          | 0:01:00        |                            |                |
| Goal Setting 5                     | 0:01:00        | Module 16 - Set a SMART goal                   | 0:01:00        | Week 7 SMART Goal          | 0:01:00        |                            |                |
| Goal Setting 6                     | 0:01:00        | Module 11 - Set a SMART goal                   | 0:01:00        | Week 8 SMART Goal          | 0:01:00        |                            |                |
| <b>Total</b>                       | <b>0:06:00</b> |                                                | <b>0:06:00</b> |                            | <b>0:06:00</b> |                            | <b>0:06:00</b> |

Supplementary Material

My Food Mood Programs Key Activity Time Requirements

| <b>My Food &amp; Mood Version 1.0</b>                           |                | <b>My Food &amp; Mood Version 2.1</b> |                | <b>My Food &amp; Mood Version 2.2</b> |                | <b>My Food &amp; Mood Version 3.0</b> |                |
|-----------------------------------------------------------------|----------------|---------------------------------------|----------------|---------------------------------------|----------------|---------------------------------------|----------------|
| <b>Activities - Self Monitoring</b>                             |                |                                       |                |                                       |                |                                       |                |
| Self-Monitoring Food Entries                                    | 0:28:00        | ModiMed Diet Score Activity           | 0:28:00        | ModiMed Diet Score Activity           | 0:28:00        | Food Entires                          | 0:28:00        |
| Self-Monitoring Mood Entires                                    | 0:14:00        | Mood Check-ins                        | 0:08:00        |                                       |                | Mood Entires                          | 0:10:00        |
| <b>Total</b>                                                    | <b>0:42:00</b> | <b>Total</b>                          | <b>0:36:00</b> | <b>Total</b>                          | <b>0:28:00</b> | <b>Total</b>                          | <b>0:44:00</b> |
| <b>Activities - Knowledge Verification &amp; Skill building</b> |                |                                       |                |                                       |                |                                       |                |
| Health & Lifestyle Diet                                         | 0:02:00        | Health & Lifestyle Diet               | 0:02:00        | Health & Lifestyle Diet               | 0:02:00        | Health & Lifestyle Diet               | 0:02:00        |
| Interactive Mediterranean Diet                                  | 0:02:00        | Activity: Can you spot a SMART Goal?  | 0:05:00        | Setting SMART Goals                   | 0:05:00        | Shopping Lists                        | 0:10:00        |
| Fibre game                                                      | 0:02:00        | Review Quiz 1                         | 0:05:00        | Modules 1-8 Quiz                      | 0:05:00        | Modules 1-8 Quiz                      | 0:05:00        |
| Making Pre & Probiotics                                         | 0:05:00        | Review Quiz 2                         | 0:05:00        | Modules 9-16 Quiz                     | 0:05:00        | Modules 9-16 Quiz                     | 0:05:00        |
| Seafood based recipe activity                                   | 0:05:00        | Recipe Review                         | 0:10:00        | Recipe Review                         | 0:20:00        |                                       |                |
| Snack building                                                  | 0:02:00        |                                       |                |                                       |                |                                       |                |
| <b>Total</b>                                                    | <b>0:18:00</b> |                                       | <b>0:27:00</b> |                                       | <b>0:37:00</b> |                                       | <b>0:22:00</b> |
| <b>Total Time Key Activities</b>                                | <b>2:02:38</b> |                                       | <b>2:01:05</b> |                                       | <b>2:03:40</b> |                                       | <b>2:04:40</b> |
