# Supplementary material for: Optimizing Engagement in an Online Dietary Intervention for Depression (My Food & Mood Version 3.0): Cohort Study
Source: PubMed Central journal article supplement (PMC8047812; doi:10.2196/24871), 2021-03-31
Supplement: mental_v8i3e24871_app4.pdf [file mental_v8i3e24871_app4.pdf]

Supplementary material

Table 1: Mapping of SDQ and MEDAS questions used to calculate the MEDAS Rescored

| MEDAS Questions                                                                     | MEDAS Scoring                      | Mapped SDQ Questions                                                                                                                   | MEDAS Rescored                                                                                                                                                                                                         |
|-------------------------------------------------------------------------------------|------------------------------------|----------------------------------------------------------------------------------------------------------------------------------------|------------------------------------------------------------------------------------------------------------------------------------------------------------------------------------------------------------------------|
| Q1. Do you use olive oil as the principal source of fat for cooking?                | 1 point for Yes                    | N/A                                                                                                                                    | Not included                                                                                                                                                                                                           |
| Q2. How much olive oil do you consume per day?                                      | 1 point for 4+ tablespoons per day | N/A                                                                                                                                    | Not included                                                                                                                                                                                                           |
| Q3. How many servings of vegetables do you consume per day?                         | 1 point for 5+ serves per day      | Q1. How many serves of vegetables do you usually eat each day?                                                                         | 1 point for 5+ serves per day                                                                                                                                                                                          |
| Q4. How many pieces of fruit do you consume per day?                                | 1 point for 3+ serves per day      | Q3. How many serves of fruit do you usually eat each day?                                                                              | 1 point for 3+ serves per day                                                                                                                                                                                          |
| Q5. How many servings of red meat, hamburger, or sausages do you consume per day?   | 1 point for <1 serve per day       | 23. How often do you usually eat meat or chicken?<br>24. Which of these meats have you eaten in the last 2 weeks? Tick all that apply. | 1 point for <1 serve per day<br><i>If red meats were selected in Q24, the percentage of options that were red meat was calculated and applied to serves in Q23, If no red meat selected in Q24, then 1 point given</i> |
| Q6. How many servings (12 g) of butter, margarine, or cream do you consume per day? | 1 point for 3+ serves per day      | N/A                                                                                                                                    | Not included                                                                                                                                                                                                           |
| Q7. How many carbonated and/or sugar-sweetened beverages do you consume per day?    | 1 point for None                   | Q16. How often do you drink soft drinks, cordial, fruit or sports drinks?                                                              | 1 point for <1 serve per day                                                                                                                                                                                           |

| MEDAS Questions                                                                                                                                                   | MEDAS Scoring                     | Mapped SDQ Questions                                                                                                                   | MEDAS Rescored                                                                                                                 |
|-------------------------------------------------------------------------------------------------------------------------------------------------------------------|-----------------------------------|----------------------------------------------------------------------------------------------------------------------------------------|--------------------------------------------------------------------------------------------------------------------------------|
| Q8. Do you drink red wine? How much do you consume per week?                                                                                                      | 1 point for 7+ standard drinks    | N/A                                                                                                                                    | Not included                                                                                                                   |
| Q9. How many servings of pulses do you consume per week?                                                                                                          | 1 point for 4+ serves per week    | Q19. How often do you usually eat legumes and soy products (e.g. peas, beans, lentils, tofu)?                                          | 1 point for 4+ serves per week<br><i>Every second day and more frequent</i>                                                    |
| Q10. How many servings of fish/seafood do you consume per week?                                                                                                   | 1 point for 3+ serves per week    | Q21. How often do you usually eat fresh or canned fish?                                                                                | 1 point for 3+ serves per week<br><i>Every second day and more frequent</i>                                                    |
| Q11. How many times do you consume commercial (not homemade) pastry such as cookies or cake per week?                                                             | 1 point for <3 serves per week    | Q12. How often do you eat snacks such as packet potato chips, biscuits (sweet or savoury), chocolate, lollies, cakes and sweet pastry? | 1 point for <3 serves per week<br><i>Twice a week and less frequent</i>                                                        |
| Q12. How many times do you consume nuts per week?                                                                                                                 | 1 point for 3+ serves per week    | 14. How often do you usually eat nuts?                                                                                                 | 1 point for 3+ serves per week<br><i>Every second day and more frequent</i>                                                    |
| Q13. Do you prefer to eat chicken, turkey or rabbit instead of beef, pork, hamburgers, or sausages?                                                               | 1 point for "Yes" or "Vegetarian" | Q23 How often do you usually eat meat or chicken?<br>Q24 Which of these meats have you eaten in the last 2 weeks? Tick all that apply. | 1 point if Q23 is None<br><br>1 point if <i>the percentage of options selected in Q24 for poultry is larger than red meat.</i> |
| Q14. How many times per week do you consume boiled vegetables, pasta, rice, or other dishes with a sauce of tomato, garlic, onion, or leeks sautéed in olive oil? | 1 point for 3+ serves per week    | N/A                                                                                                                                    | Not included                                                                                                                   |

|                 |               |                      |                |
|-----------------|---------------|----------------------|----------------|
| MEDAS Questions | MEDAS Scoring | Mapped SDQ Questions | MEDAS Rescored |
| Total Points    | 14            |                      | 9              |
